# 1 **Non-selective cation permeation in an AMPA-type** 2 **glutamate receptor**

3 Johann Biedermann<sup>1,2</sup>, Sebastian Braunbeck<sup>1,2</sup>, Andrew J. R. Plested<sup>1,2</sup>§ and Han Sun<sup>2</sup>§

4 <sup>1</sup>Institute of Biology, Cellular Biophysics, Humboldt Universität zu Berlin, 10115 Berlin, Germany; Charité –  
5 Universitätsmedizin Berlin, corporate member of Freie Universität Berlin and Humboldt-Universität zu Berlin, and  
6 Berlin Institute of Health, NeuroCure Cluster of Excellence, Charitéplatz 1, 10117 Berlin, Germany

7 <sup>2</sup>Leibniz Forschungsinstitut für Molekulare Pharmakologie (FMP), 13125 Berlin;

8 §To whom correspondence should be addressed: [andrew.plested@hu-berlin.de](mailto:andrew.plested@hu-berlin.de) or [hsun@fmp-berlin.de](mailto:hsun@fmp-berlin.de)

## 9 **Abstract**

10 Fast excitatory synaptic transmission in the central nervous system relies on the AMPA-type glutamate  
11 receptor (AMPA). This receptor incorporates a non-selective cation channel which is opened by the  
12 binding of glutamate. Although the open pore structure has recently become available from cryo-electron  
13 microscopy (Cryo-EM), the molecular mechanisms governing cation permeability in AMPA receptors are  
14 not understood. Here, we combined microsecond molecular dynamics (MD) simulations on a putative  
15 open state structure of GluA2 with electrophysiology on cloned channels to elucidate ion permeation  
16 mechanisms. Na<sup>+</sup>, K<sup>+</sup> and Cs<sup>+</sup> permeated at physiological rates, consistent with a structure that  
17 represents a true open state. A single major ion binding site for Na<sup>+</sup> and K<sup>+</sup> in the pore represents the  
18 simplest selectivity filter (SF) structure for any tetrameric cation channel of known structure. The  
19 minimal SF comprised only Q586 and Q587, and other residues on the cytoplasmic side formed a cone-  
20 shaped void that lacked major interactions with ions. We observed Cl<sup>-</sup> invasion of the upper pore,  
21 explaining anion permeation in the edited form of GluA2. A permissive architecture of the SF  
22 accommodated different alkali metals in distinct solvation states to allow rapid, non-selective cation  
23 permeation, and co-permeation by water. Simulations suggested Cs<sup>+</sup> uses two equally populated ion  
24 binding sites in the filter and we confirmed with electrophysiology of GluA2 that Cs<sup>+</sup> is more permeant  
25 than Na<sup>+</sup>, consistent with serial binding sites preferentially driving selectivity.

## 26 **Significance Statement**

27 AMPA-type glutamate receptors (AMPA) are key actors in neurotransmission, making the final step in  
28 a relay of excitability from one brain cell to another. The receptor contains an integral ion channel,  
29 which, when opened by neurotransmitter binding, permits sodium and other cations to cross the cell  
30 membrane. We investigated permeation of sodium, potassium and caesium in an AMPAR at the atomistic  
31 level using a computational molecular dynamics approach on a structure with the ion channel pore in a  
32 presumably open state. We determined that the region selecting between cations is the simplest of any  
33 channel of this type. Distinct from ion channels that select single ion species, cations are never fully  
34 dehydrated and have only one major ion binding site in the filter. Simulations suggested two similar  
35 binding sites for caesium, and studies of AMPARs in mammalian cell membranes showed that this makes  
36 caesium more permeant than sodium.

## 37 **Introduction**

38 Glutamate receptor ion channels are found at synapses throughout the vertebrate nervous  
39 system, where they convert sub-millisecond glutamate signals into cation currents. Advances  
40 in structural biology have provided molecular scale maps of their ion pores, permitting  
41 comparison with a burgeoning menagerie of structures from related ion channels. It has been  
42 comparatively difficult to obtain candidate open pore structures of glutamate receptors, with  
43 the notable exceptions being from single particle cryo-electron microscopy (Cryo-EM) of  
44 complexes between GluA2 and Stargazin (1, 2). However, it is unclear from simple inspection  
45 of these structures whether a) the ion pore is conductive, or b) it is open to its fullest extent,  
46 or to the highest conductance level. However, a substantial body of electrophysiological work  
47 provides good benchmarks for how these structures should behave. For example, canonical  
48 measurements of channel conductance and reversal potentials show that alkali earth cations  
49 from sodium ( $\text{Na}^+$ ) up to caesium ( $\text{Cs}^+$ ) should permeate GluA1 (3) and unedited GluA2 (4)  
50 approximately equally well and the single channel conductance of the full level of GluA2 (Q)  
51 should be considerable ( $\sim 30$  pS, ref. 5).

52 Most computational work on ion permeation through channels has been focused on simple,  
53 selective potassium ( $\text{K}^+$ ) channels like KcsA (6, 7), being the first reported crystal structures of  
54 ion channels (8). Thanks to their minimal sequences, these channels demand little  
55 computational overhead. Their key structural features are two membrane spanning helices and  
56 a reentrant loop forming a narrow selectivity filter (SF) for permeant ions. This core motif  
57 defines a superfamily of tetrameric and pseudotetrameric channels that encompass selective,  
58 semi-selective and non-selective cation conductances. In common with many eukaryotic  
59 channels, the AMPA type glutamate receptor has a pore domain whose gating state is controlled  
60 by substantially larger domains outside the membrane (amino terminal domain, ATD and  
61 ligand binding domain, LBD, Figure 1A) which account for about 75% of the protein mass. The  
62 large size presents a challenge for conventional molecular dynamics (MD) simulations, with  
63 the AMPA receptor being about 6 times bigger than KcsA.

64 It remains to be seen to what extent key features of ion permeation elucidated in prokaryotic  
65 channels (selectivity, discrete sites, desolvated ions and block by divalent ions) are widely  
66 applicable in channels with more substantial architectures. Recent experimental and MD work  
67 on non-selective prokaryotic channels like NaK and NaK-CNG suggests that ion permeation in  
68 these channels differs substantially from classical  $\text{K}^+$  selective ion permeation (9–11). The SF  
69 of non-selective cation channels is much more flexible, with fewer ion binding sites leading to  
70 distinct conduction mechanisms and hydration states for  $\text{Na}^+$  and  $\text{K}^+$  when passing through the

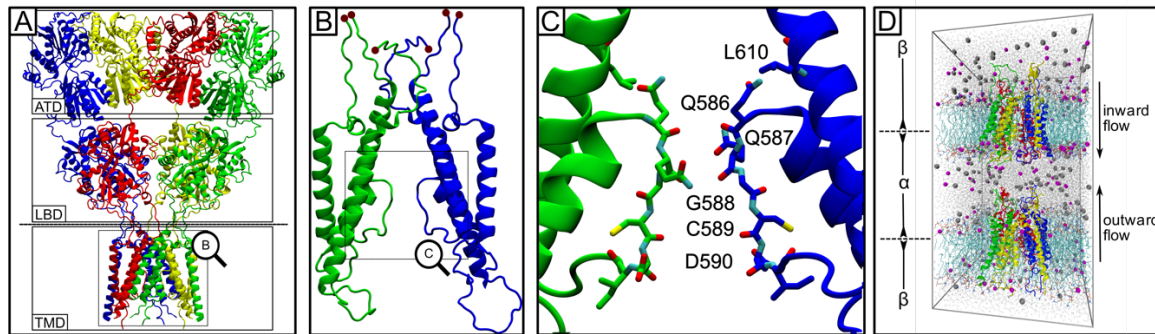

**Figure 1. AMPA receptor and the simulation setup** (A) The activated open state of the AMPA receptor from Cryo-EM (PDB ID: 5WEO) (1) with Stargazin molecules removed. The receptor is composed of amino terminal, ligand binding and transmembrane domains (ATD, LBD and TMD). (B) The TMD and linkers to the LBD layer were included the MD simulations. The sites where the linkers were truncated and physically restrained (see Methods) are marked with red balls. Two out of the four subunits are shown. (C) The selectivity filter region of the AMPA receptor pore, with key residues labelled. Again, only two diagonally-opposed subunits are drawn. (D) The computational electrophysiology setup was composed of two tetrameric AMPA channels, each embedded in a separate POPC lipid bilayer, solvated with water molecules and ions. A small cation imbalance between the two compartments  $\alpha$  and  $\beta$  was maintained during the simulations. The resulting gradient gave a transmembrane potential to drive ion permeation.

71 filter. In the AMPA receptor, in one activated open Cryo-EM structure of GluA2 (1), density for  
72 a presumptive hydrated sodium ion was observed adjacent to the unedited Q586 residue. In  
73 the structure of edited GluA2 (Q586R) with Stargazin (2), ions were absent. The closed state  
74 structure of a GluA1:A2 heteromer featured strong density of unknown identity adjacent to  
75 C589 (12). Whether the paucity and heterogeneity of resolved ions is due to a lack of order in  
76 the filter region, the lack of detail in the coulomb potential density or a true deficit of ions  
77 remains unclear. However, observations in these AMPA receptor structures are in marked  
78 contrast to the Cryo-EM structures of several other non-selective cation channels such as  
79 hyperpolarization-activated cyclic nucleotide-gated (HCN) (13) and cyclic nucleotide-gated  
80 (CNG) channels (14) where two or three bound ions were visible. Further context comes from  
81 canonical  $K^+$ -selective channels which feature up to 4 ions in a row (15) and crystal structures  
82 of  $Ca^{2+}$ -selective TRP channels where two  $Ca^{2+}$  ions were readily resolved (16).

83 Here we used MD-based computational electrophysiology to examine ion permeation through  
84 the mammalian AMPA receptor ion channel. We determined that the published structure is  
85 stably open, suitably detailed for MD simulations and probably represent a native fully-open  
86 state. We identified a minimal selectivity filter consisting of a single ion binding site that does  
87 not dehydrate ions. In simulations,  $Cs^+$  co-opted a secondary binding site. Consistent with  
88 multiple sites promoting ion selectivity, electrophysiology of AMPARs in HEK cells showed that  
89  $Cs^+$  is more permeant than  $Na^+$ .

## 90 Results

### 91 *Monovalent cation permeation*

92 Our starting structure for MD simulations was the AMPAR channel in its activated conformation  
93 (PDB ID: 5WEO) (1), which we embedded into a palmitoylcholine (POPC)  
94 lipid bilayer (Figure 1D). To reduce the number of atoms in the simulations, we removed the  
95 extracellular ATD and LBD and the four Stargazin molecules decorating the periphery of the  
96 channel. To retain the open channel conformation, we held the transmembrane domain (TMD)  
97 of AMPAR open by physically restraining the end of the truncated linkers (Figure 1B, see  
98 Methods for details). This approach, while facile, was highly reproducible, and the channel did  
99 not close spontaneously during any simulation run (Figure 2A). Simulations of ion conduction  
100 were performed with the computational electrophysiology method (17, 18). In this setup, the  
101 simulation box contains two membranes that define two compartments and a voltage  
102 difference across each membrane is created by an ion gradient that is maintained alchemically  
103 during the simulations (Figure 1D).

104 Classical electrophysiology experiments suggest AMPARs are broadly non-selective over  
105 different alkali metal cations, although most measurements were not made on GluA2 (3, 19).  
106 We began by performing a series of ion permeation simulations with the principal biological  
107 ion species, Na<sup>+</sup> and K<sup>+</sup>. To ensure the robustness of our observations, we undertook  
108 simulations at different temperatures, with different force fields and different driving forces on  
109 the ions (see Discussion and Methods). The conductances of the AMPA channel pore were  
110 directly calculated from the ion permeations observed in these simulations. We counted cations  
111 that traversed the entire narrow region of the pore domain delineated by the <sup>586</sup>QQGCDI<sup>591</sup>  
112 sequence, summarized in Table 1 and Figure 2B. Outside of this region, ion movements lacked  
113 order and made only rare interactions with the channel leading to a largely flat energy  
114 landscape (Figure S1). In all trajectories, the channel pore remained conductive for Na<sup>+</sup> or K<sup>+</sup>  
115 during the entire 500 ns run, as exemplified by the ion track plots in Figure 2A. In a typical  
116 500 ns trajectory with a transmembrane potential of 450 mV, we recorded over 40 K<sup>+</sup>  
117 permeation events, corresponding to a conductance of 32 pS.

118 Although K<sup>+</sup> permeated readily in the simulations with AMBER99sb force field (20), we observed  
119 substantially fewer permeations of Na<sup>+</sup> under the same simulation condition. The simulated  
120 conductances of both K<sup>+</sup> and Na<sup>+</sup> were higher in the CHARMM36 force field (21), allowing direct  
121 observation of Na<sup>+</sup> permeation at close to physiological rates (Table 1, Figure 2B). However,  
122 the permeation of K<sup>+</sup> in the CHARMM36 forcefield approaches implausibly high rates, albeit

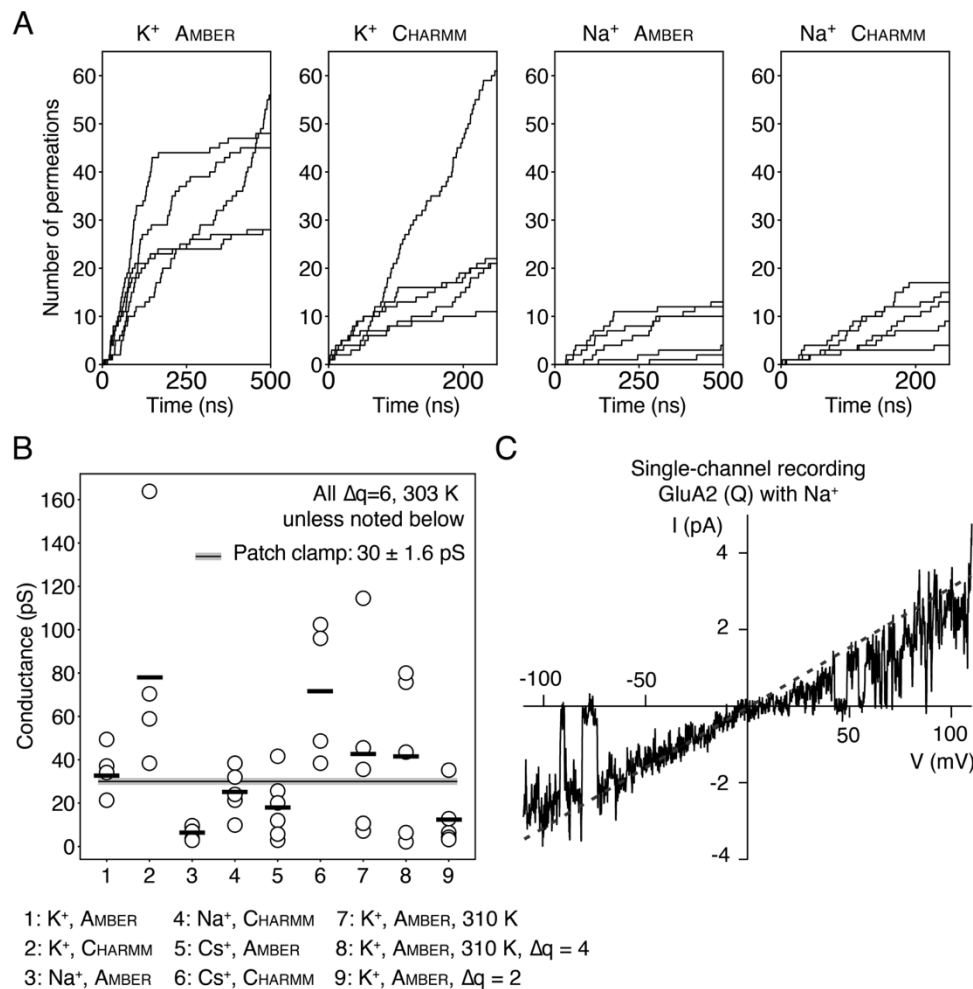

**Figure 2. Ion conductances in GluA2** (A) Cumulative ion permeation events in the GluA2 pore for individual trajectories of K<sup>+</sup> and Na<sup>+</sup> simulations with the respective force fields. The simulations were performed at 303 K using an ion imbalance of 6e<sup>-</sup> between two compartments  $\alpha$  and  $\beta$ . (B) Conductances derived from the K<sup>+</sup>, Na<sup>+</sup> and Cs<sup>+</sup> simulations performed with AMBER99sb and CHARMM36 force fields. Simulations were carried out at different temperature and with different ion imbalance between two compartments  $\alpha$  and  $\beta$ . The experimental value derived from single-channel recordings for Na<sup>+</sup> is displayed as a grey line. (C) Outside-out patch clamp electrophysiology of a single GluA2 (Q) channel in symmetrical Na<sup>+</sup>. The voltage ramp was made in the presence of 10 mM glutamate and 100  $\mu$ M CTZ. The dashed line shows the fitted chord conductance, which for this patch was 33 pS.

123 with a very large variability. Higher conductance using CHARMM36 compared to AMBER99sb  
 124 was previously reported in simulations of K<sup>+</sup> selective and non-selective NaK-CNG channels (9).

### 125 *Binding sites for permeant ions*

126 Selectivity filter architectures differ widely amongst tetrameric ion channels. Whilst K<sup>+</sup>  
 127 channels generally have long, straight filters, non-selective cation channels tend to have shorter  
 128 filters that display more plastic or eccentric geometries (22, 23). To understand how the  
 129 AMPAR selectivity filter supports cation-selective ion conduction, we determined one- and two-  
 130 dimensional ion occupancies in the AMPA channel, which were sampled from cumulative



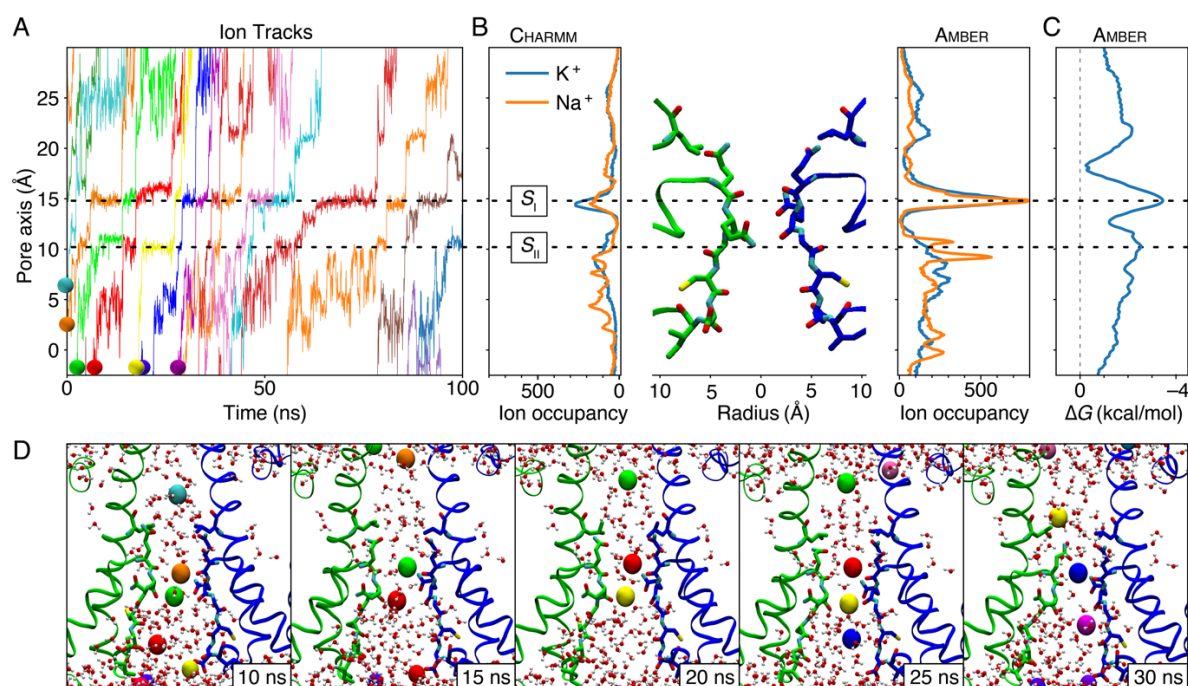

**Figure 3. Simulated Na<sup>+</sup> and K<sup>+</sup> permeation of GluA2.** Simulations were performed at 303 K using an ion imbalance of 6 e<sup>-</sup> between two compartments  $\alpha$  and  $\beta$ . (A) Representative traces of K<sup>+</sup> passing through the SF of AMPA channel pore. Ions drawn in panel D are indicated with balls. (B) One-dimensional ion occupancy of cations within the SF of the AMPA channel pore. Left panel: occupancy from simulations with the CHARMM36 force field, right panel from AMBER99sb force field. (C) Free-energy profile for K<sup>+</sup> permeation constructed from AMBER99sb force field. (D) Representative snapshots of a simulation (from Movie S1) showing multiple K<sup>+</sup> ions passing the selectivity filter during ion conduction. The color code of ions is identical with the ion track plot in panel A.

131 simulations of K<sup>+</sup> and Na<sup>+</sup> with the respective force fields (Figure 3B, 4A and S2). For each ion  
 132 species, these plots reveal only one principal binding site (which we call S<sub>I</sub>) in the SF, which is  
 133 located around 15 Å along the pore axis (Figure 3). At this site, the primary coordination of  
 134 permeant ions is by backbone carbonyls of Q586 that replace some but not all of waters of  
 135 hydration (Figure S3). Secondary, less frequent interactions occur with the mobile side chain  
 136 of Q586 and the backbone carbonyls of Q587. In some trajectories using AMBER99sb force field,  
 137 solvated Na<sup>+</sup> ions stay at the S<sub>I</sub> longer than 100 ns (Figure 4B), which may explain the slower  
 138 permeation. During outward permeation, ions leaving the S<sub>I</sub> site frequently pause above the tip  
 139 of the SF (25 Å at the pore axis in Figure 4A) and then rapidly enter bulk water as they traverse  
 140 the upper reaches of the channel. Before reaching the major binding site S<sub>I</sub>, multiple ions can  
 141 simultaneously enter the inner mouth of the region, classically expected to be part of the SF  
 142 (2, 24), and composed by the residues G588, C589 and D590. K<sup>+</sup> and Na<sup>+</sup> paused frequently  
 143 but briefly at a secondary site (which we denote S<sub>II</sub>) which is positioned around 10 Å into the  
 144 pore, cytoplasmic to the S<sub>I</sub> site (Figure 3B). Compared to the primary site, the S<sub>II</sub> site was  
 145 weakly populated with shorter residence times (Figure 4B), Therefore we conclude that the

146 true SF region of the AMPA is the shortest seen in any tetrameric channel to date, comprising  
147 essentially only Q586 and Q587 for accommodating  $S_I$  and  $S_{II}$  sites.

### 148 *Cation conduction mechanism and selectivity*

149 During the ion conduction, most of the time we observed multiple ions reside simultaneously  
150 in the canonical SF region of  $^{586}\text{QQGCDI}^{591}$  (Figure 3D, Movie S1 and S2), with an overall time-  
151 average number of  $2.4 \pm 0.6$  and  $2.3 \pm 0.7$  for  $\text{K}^+$  and  $\text{Na}^+$  respectively in the AMBER simulation  
152 runs (Figure S4). Ions followed a loosely coupled knock-on mechanism, where in most cases  
153 the exit of an ion to the upper cavity was closely followed by the entry of an ion to the  $S_I$  site  
154 (Figure 3D, Movie S1 and S2). From the free-energy profiles (Figure 3C), we conclude that the  
155 energy barriers bracketing  $S_I$  (at around 13 Å and 18 Å along the pore axis) are the major  
156 obstacles for ion conduction in the SF. The ion entering the  $S_I$  site was normally supplied from  
157 the adjacent  $S_{II}$  site, presumably aiding permeant ions to overcome the main energy barriers  
158 before and after the  $S_I$  site (6).

159 To understand better where cation selection occurs, we examined the paths of chloride ( $\text{Cl}^-$ )  
160 ions during our simulations. Consistent with a very short selective region,  $\text{Cl}^-$  ions occasionally  
161 entered the cone-shaped void below the SF and readily approached the QQ-filter from the  
162 bundle crossing side. Surprisingly,  $\text{Cl}^-$  ions found stable binding sites immediately above the  
163 QQ-filter (Figure S5) in all simulations. We also observed one  $\text{Cl}^-$  ion permeation event (Movie  
164 S3), providing a crude estimate of the  $\text{Cl}^-:\text{K}^+$  permeability ratio at around 1:220. In practical  
165 terms, this relative selectivity would correspond to an approximately 15  $\mu\text{V}$  shift in the reversal  
166 potential (GHK equation, see Methods), compared to no  $\text{Cl}^-$  permeation at all. In other words,  
167 at this level of selection between cations and chloride, any reversal potential shifts are too small  
168 to be measured experimentally. Further context comes from the observation that R-edited  
169 homomeric GluA2 channels are anion permeable (25). The observation of infrequent yet stable  
170 anion approach to the face of the QQ-filter favoured for anions by the electric field provides a  
171 simple explanation as to how this point mutation can switch selectivity simply by changing  
172 local electrostatics.

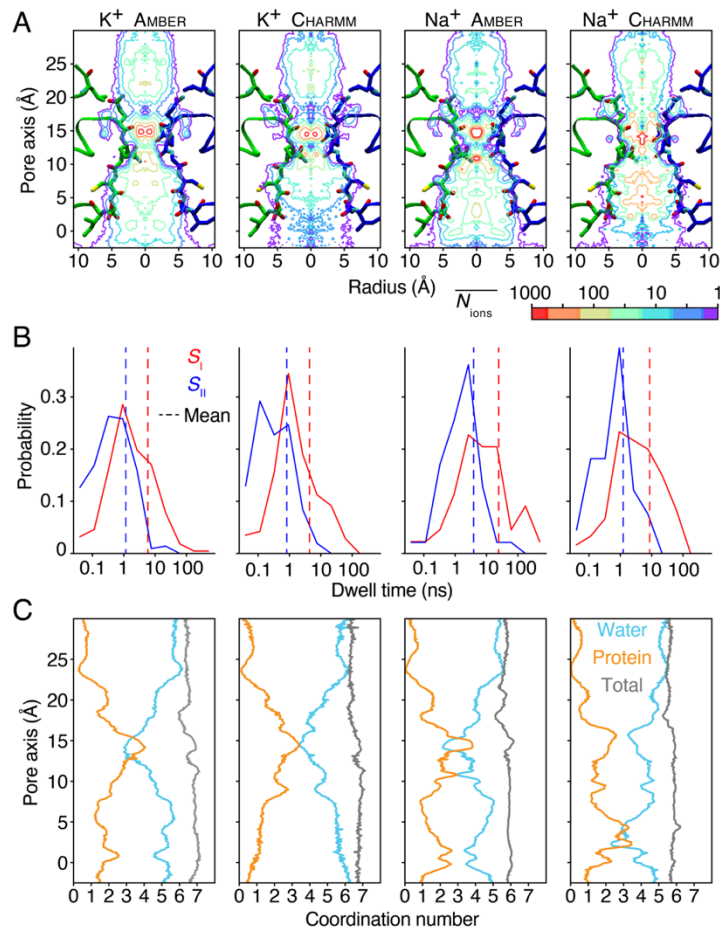

**Figure 4. Ion occupancy, dwell time distribution and hydration states.** (A) Two-dimensional ion occupancy within the SF resolved radially and in pore axis (z axis) as a contour plot calculated from MD simulations of GluA2 with different ion types (K<sup>+</sup> and Na<sup>+</sup>) and force fields (AMBER99sb and CHARMM36). The simulations were performed at 303 K using an ion imbalance of 6e<sup>-</sup> between the two compartments,  $\alpha$  and  $\beta$ . The ion occupancy in number of ions per 0.001 Å<sup>3</sup> per 500 ns was normalized according volume change along radius. (B) Dwell time histograms for S<sub>I</sub> and S<sub>II</sub> binding sites. Vertical dashed lines are means of the respective dwell times. (C) The number of oxygens within the first hydration shell of the according ion type along the pore axis. The number of coordinating water oxygens in blue, of coordinating protein oxygens in orange and the sum in grey.

### 173 *Ion hydration states during permeation*

174 To determine the ion hydration states during permeation, we calculated the number of ion-  
 175 coordinating oxygens from both water molecules and protein residues within each ion's first  
 176 solvation shell. Hydration shells are dynamic; here we defined the waters of hydration using  
 177 the radii corresponding to the minimum in the radius of gyration profiles: 3.1 Å for Na<sup>+</sup>, 3.4 Å  
 178 for K<sup>+</sup>, and 3.8 Å for Cs<sup>+</sup> (26, 27). All monovalent ions were principally coordinated by waters  
 179 in the lower SF region (Figure 4C), while the contribution of protein oxygens (backbone  
 180 oxygens of Q586, backbone and side-chain oxygens of Q586 and Q587, Figure S3) increases  
 181 substantially at the major ion binding site and surpasses the water oxygens for K<sup>+</sup> and Cs<sup>+</sup>. The  
 182 average number of ion-coordinating oxygens in the first hydration shell (black line) remained



183 remarkably stable along the pore axis, being 6, 7 and 8 for  $\text{Na}^+$ ,  $\text{K}^+$  and  $\text{Cs}^+$ , respectively (Figure  
 184 4C). This total number of ion-coordinating oxygens was in very good agreement with the  
 185 coordination number for hydrated ions determined experimentally (28). The simulations  
 186 indicate a qualitatively similar mechanism for each ion species. Cations are never fully  
 187 dehydrated, leading to appreciable water co-permeation. The retention of water is probably a  
 188 strong factor in determining the lack of selectivity across the alkali metal series.

### 189 *Caesium permeation*

190 Classical electrophysiological measurements of reversal potentials for cloned glutamate  
 191 receptors show at most minor differences in the permeation of  $\text{Cs}^+$  (van der Waals radius 343  
 192 pm) from that of  $\text{Na}^+$  and  $\text{K}^+$  (radii 227 pm and 280 pm respectively) (3). We reasoned that to  
 193 achieve similar permeation statistics despite its greater size,  $\text{Cs}^+$  should either alter selectivity  
 194 filter geometry, occupy distinct binding sites or have radically different hydration state during  
 195 permeation. To resolve this point, we simulated  $\text{Cs}^+$  permeation in the same conditions as for  
 196  $\text{K}^+$  and  $\text{Na}^+$ . From both AMBER and CHARMM simulations we observed a moderately higher  $\text{Cs}^+$   
 197 permeation rate (Table 1 and Figure 2B) compared to  $\text{Na}^+$ . However, the geometry at the tip  
 198 of the pore loop did not change. The hydration of  $\text{Cs}^+$  is similar to  $\text{K}^+$ , with protein oxygens  
 199 outnumbering the water oxygens at the  $S_I$  and  $S_{II}$  sites in the QQ selectivity filter. However, in  
 200 AMBER simulations the major binding site ( $S_I$ ) for  $\text{Cs}^+$  is axially displaced by about 0.5 Å towards  
 201 the bundle crossing compared to those of  $\text{K}^+$  and  $\text{Na}^+$  (Figure 5B, Figure S2), with a

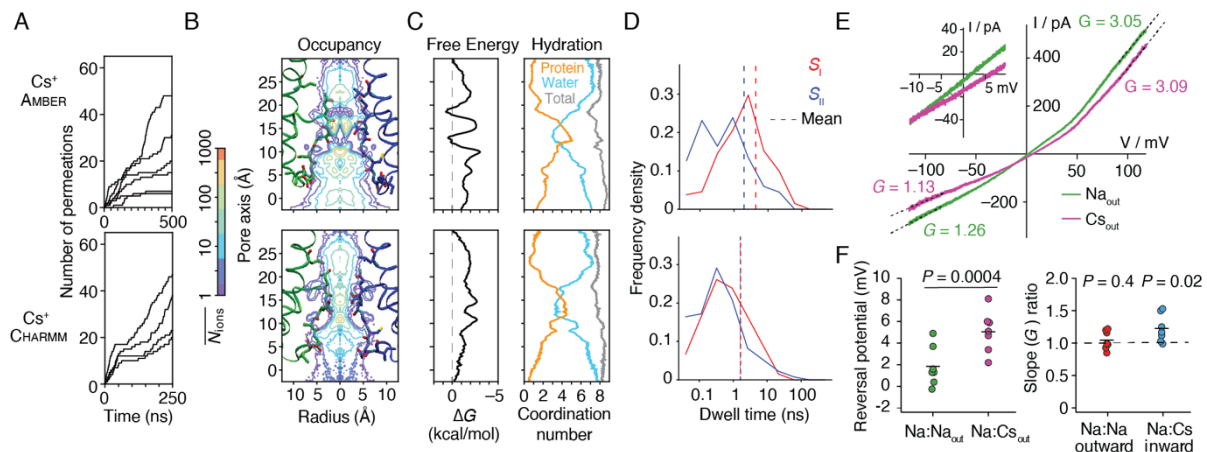

**Figure 5.  $\text{Cs}^+$  permeation of GluA2** (A) Permeation events for  $\text{Cs}^+$  in the AMBER99sb and CHARMM36 force fields. (B) Two-dimensional ion occupancy plots (C) Free energy and hydration profiles for  $\text{Cs}^+$  along the pore axis. (D) Dwell time histograms for  $\text{Cs}^+$  in the  $S_I$  and  $S_{II}$  sites, with mean dwell time for each site indicated with a dashed line. (E) Outward rectifying responses to voltage ramps in  $\text{Na}^+$  (green) and  $\text{Cs}^+$  (purple) measured with patch clamp electrophysiology. The outward rectification (ratio of chord conductances at +100/-100 mV) was  $2.7 \pm 0.3$  for  $\text{Na}^+$  and  $3.1 \pm 0.3$  for  $\text{Cs}^+$  ( $n = 7$  patches). Inset shows the typical shift in reversal potential on exchange of external  $\text{Cs}^+$  and  $\text{Na}^+$ . The pipette solution contained  $\text{Na}^+$ . (F) Reversal potential of AMPAR currents in external  $\text{NaCl}$  and  $\text{CsCl}$  solution and conductance ratios of  $\text{Na}^+$  versus  $\text{Cs}^+$  for inward and outward permeation. Probability of no difference in the slope ratio was versus a ratio of 1 with paired Student's t-test.

202 concomitant longer distance to the  $S_{II}$  site. Most critically, in both AMBER and CHARMM  
203 simulations, the mean residence time for  $Cs^+$  at the  $S_I$  site was much less ( $\sim 1$  ns) than for  $Na^+$   
204 or  $K^+$  and matched that at the  $S_{II}$  site (Figure 4B and Figure 5D). A prediction from its serial  
205 binding to two effectively equivalent sites is that  $Cs^+$  may be selected over  $Na^+$  and  $K^+$ , and  
206 thus be more permeant.

207 The permeation of cations in GluA2 (Q) may be different to that observed in extensive studies  
208 of GluA1(3). We performed patch clamp electrophysiology experiments on unedited GluA2  
209 channels expressed in HEK 293 cells to reexamine the reversal potentials and slope  
210 conductances for  $Na^+$  and  $Cs^+$ . We readily detected a small but consistent shift in the reversal  
211 potential in external  $Cs^+$  of  $3.7 \pm 0.5$  mV ( $n = 7$  patches), meaning  $Cs^+$  was more permeant  
212 than  $Na^+$  ( $P_{Cs} : P_{Na} = 1.16 \pm 0.02$ ) like in GluA1. The slope conductance for the inward arm of  
213 the I-V relation in  $Cs^+$  was similar to that of  $Na^+$  ( $82 \pm 6\%$ ;  $n = 7$  patches). These observations  
214 are consistent with the AMPAR pore being mildly selective for  $Cs^+$  over  $Na^+$  and  $Cs^+$  retaining  
215 a high conductance despite using a subtly different permeation mechanism on the same overall  
216 scaffold.

### 217 *Conformational flexibility in the vicinity of the SF*

218 Examining the RMSF of heavy atoms in residues in the traditional SF ( $^{585}MQQGCDI^{591}$ ) region  
219 reveals a clear split in dynamics (Figure 6). The backbone atoms at the pore loop ( $^{585}MQQG^{588}$ )  
220 are comparatively immobile, similar to the M3 backbone adjacent at L610. In the lower filter  
221 region, the backbone and side chains of CDI residues are comparatively unrestrained. The side  
222 chain of Q586 is more flexible than the Q587, as it points toward the cavity and has thus more  
223 freedom for movement. Furthermore, the dynamics of the SF were indistinguishable across the  
224 different ionic conditions, with the RMSF profiles of both backbone and side-chain atoms in  
225 the  $Na^+$ ,  $K^+$  and  $Cs^+$  simulations being highly similar (Figure 6). These observations further  
226 underline that the stable structure of the QQ filter is sufficient for selecting cations.

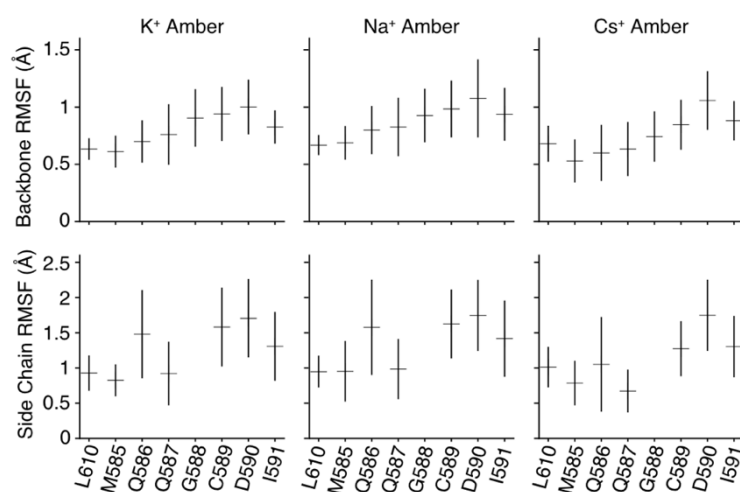

**Figure 6. Root mean square fluctuations (RMSFs) of residues surrounding the selectivity filter.** RMSFs were calculated separately for backbone and side-chain atoms of selectivity filter residues  $^{585}MQQGCDI^{591}$  and L610. The simulations were performed at 303 K using an ion imbalance of  $6 e^-$  between the two compartments  $\alpha$  and  $\beta$ .

## 227 Discussion

228 In this study, we simulated permeation of various monovalent cations through AMPA channel  
229 pore using the computational electrophysiology approach. Our direct measurements of ion  
230 conduction confirm that the Cryo-EM structure reported by Twomey *et al.* (1) is bona-fide open  
231 state, with a conductance large enough to be the fully open state. Particularly, the upper bundle  
232 crossing in this structure, which we held open mechanically, provides almost no barrier to  
233 conduction. Our simulations provide the first answer to how this channel can allow a range of  
234 cations to pass with similar rates. The simulated conductance shows a striking agreement with  
235 the single-channel recording data of Na<sup>+</sup> in GluA2, suggesting that to a first approximation,  
236 the ion conduction we observe resembles physiological permeation. The simulations suggested  
237 that Cs<sup>+</sup> permeates with a subtly different mechanism to Na<sup>+</sup> and K<sup>+</sup>, and we could provide  
238 evidence for this using patch clamp electrophysiology.

239 Although in principle using computational electrophysiology approach we should simulate both  
240 inward and outward ion permeations simultaneously from one computational setup, we only  
241 observed outward ion flux (from intracellular to extracellular) through the AMPA channel pore  
242 in all simulation setups. All simulated conductance listed in Table 1 and Figure 3B are therefore  
243 derived from the outward ion permeations. Similar directional flux has also been observed in  
244 previous computational electrophysiology simulations of K<sup>+</sup> selective channels such as KcsA  
245 (29). Although electrophysiology reveals that the channel is outward rectifying (Figure 5) for  
246 both Na<sup>+</sup> and Cs<sup>+</sup>, the magnitude of the effect (about 3 fold) is too small to be consistent with  
247 an total absence of inward permeation in our simulations. We hypothesize that inward and  
248 outward ion permeations may use different SF conformations. In this interpretation,  
249 simulations with a longer time scale than performed in the current study would be necessary  
250 to reach the conductive states required for inward ion permeations.

251 For the major physiological ions Na<sup>+</sup> and K<sup>+</sup>, we observed only one strongly populated ion  
252 binding site ( $S_I$ ) within the SF. This main ion binding site is remarkably congruent with the  
253 single ion density observed in the Cryo-EM structure (PDB ID: 5WEO, Figure S6). The centres  
254 of the ion densities along the pore axis are within 1 Å. This difference may in part be attributed  
255 to the simulations being performed under transmembrane voltages, while the Cryo-EM  
256 structure was determined at 0 mV in the absence of ion gradients. In contrast to the major  
257 binding site  $S_I$ , ion binding to a second on-axis site ( $S_{II}$ ) in our simulations was rather short-  
258 lived and less ordered. This observation markedly contrasts with the four adjacent ion binding  
259 sites of canonical K<sup>+</sup> channels that were determined by X-ray crystallography (15) and MD  
260 simulations (29). In several non-selective cation channels such as NaK (30, 31), CNG (14) and

261 HCN channels (13), the SF consists of either two or three consecutive sites. It has been  
262 suggested that a single ion binding site within the NMDA receptor SF is the key to the ion non-  
263 selectivity of these cation channels (32). Our finding from the AMPA simulations revealing a  
264 single major ion binding site with twin energy barriers is clearly in line with this mechanism.  
265 In other words, the AMPA receptor channel is minimally selective and has one of the simplest  
266 observed selectivity filters comprising only two residues (Q586 and Q587).

267 Moreover, we found that during permeation hydration states of the ions in the SF also  
268 significantly differ from the ones in the  $K^+$ -selective and several non-selective cation channels.  
269 Previous simulations suggested  $K^+$  pass desolvated through the SF of potassium channels (9),  
270 while an entire hydration shell surrounding  $Na^+$  ions was observed whilst they traverse the SF  
271 (9, 27) (10). There is no narrow constriction in the AMPA receptor pore to match those in  $K^+$   
272 and non-selective NaK channels, with the narrowest portion at Q586 (7.6 Å between CB atoms  
273 in 5WEO). Therefore, all monovalent ions remain mostly hydrated in the SF and are only  
274 partially dehydrated at Q586. Dehydration of smaller  $Na^+$  ions requires much more energy  
275 (33) (34), and consistent with this expectation, the  $Na^+$  ions were more hydrated at the QQ  
276 filter compared to  $K^+$  and  $Cs^+$ . The very short SF has a permissive architecture that  
277 accommodates the different alkali metals in distinct solvation states.

278 Based on these observations, we propose that the mechanism of ion conduction through the  
279 AMPA channel pore is remarkably different from that seen to date in other tetrameric channels.  
280 For  $K^+$  (29) and several other non-selective cation channels such as NaK (10) and the NaK-  
281 CNG mutant (9), ions strictly follow a direct knock-on mechanism when passing through the  
282 SF. In contrast, although multiple cations generally occupied the SF-region in the AMPA  
283 receptor pore, only one stable axial binding site could be resolved, resulting in a quasi-  
284 uncoupled knock-on for  $K^+$  and  $Na^+$  conduction. All ions retained a degree of hydration and  
285 water was co-permeant. Furthermore, quite distinct from the non-selective NaK channel (10),  
286 all monovalent ions investigated in this study ( $K^+$ ,  $Na^+$  and  $Cs^+$ ) follow a similar path during  
287 permeation, with no requirement for conformational change for physiological permeation  
288 rates. The conduction mechanism in the AMPA channel displays some similarities with  $Na^+$   
289 conduction in the voltage-gated sodium (NaV) channels, where both loosely coupled knock-on  
290 and “pass-by” processes compete during  $Na^+$  permeation (27, 35).

291 Using extensive MD simulations combined with Markov state model analyses, Furini and  
292 colleagues suggested that ion-triggered conformational change within the SF determines ion  
293 selectivity in bacterial sodium channels (36). Along the same lines, in our previous study on  
294 non-selective NaK channels we proposed that  $K^+$  and  $Na^+$  permeation is coupled to distinct SF

295 conformations that are stable in the microsecond time scale and did not readily interconvert  
296 (10). In marked contrast to these findings, the short AMPA selectivity filter does not show ion-  
297 dependent conformations, and rather, achieves non-selectivity in a quite simple way. The  
298 AMPAR provides a minimal selection architecture that is insensitive to ion diameter; the ion  
299 hydration shells provide a compensatory variation. However, it is probably not correct to think  
300 of the AMPA receptor SF region as a single permissive structure. Instead, the SF of the AMPA  
301 receptor is flexible at the nanosecond time scale and allows different ions to permeate using  
302 distinct mechanisms but at similar rates. It is also possible that the selectivity filter may be  
303 coupled to the upper gate movement or fluctuation as in KcsA (37) and that by holding the  
304 upper gate in a single stable conformation, we reduced the SF dynamics. Recent results  
305 suggesting that SF perturbations can change the desensitization lifetime are consistent with  
306 coupling to regions outside the pore domain (38). On this point, results from CryoEM are  
307 inconclusive, with some open and closed structures having similar SF architectures, whereas  
308 one open state structure (edited to R586) has marked two fold-symmetry (2). Restraining the  
309 linkers was enough to keep the channel stably open, even though we removed flanking  
310 Stargazin molecules. Although longer timescales may be required to see any putative relaxation  
311 into a TARP-free state, this observation provides further evidence that the modulation of  
312 channel gating by Stargazin and other TARPs is principally extracellular (39). Future work will  
313 further clarify the relation between conduction properties, receptor conformation and  
314 dynamics of the AMPAR pore (40).



## 315 **Methods**

### 316 *Computational Electrophysiology*

317 To prepare the Cryo-EM structure of the AMPAR in an open state (PDB ID: 5WEO) (1) for MD  
318 simulations, we removed the four copies of the auxiliary protein Stargazin. We truncated the  
319 receptor linkers before I504 and G774 and after I633 and A820 and added N-methyl amide  
320 (NME) and acetyl (ACE) caps at the newly created C- and N-termini. We used MODELLER (41)  
321 to build missing loops (residues 550 to 564 of the intracellular loops of each subunits) as well  
322 as missing side chains (sidechains of S818 and R819 of subunits B and D, K505 of subunit D).  
323 To hold the truncated structure together and in an open state, we restrained protein at the  
324 heavy atoms of all four peptide chain termini with a harmonic potential of 10000 kJ/mol.

325 We performed MD simulations with both CHARMM36 (21) and AMBER99sb (20) force fields. In  
326 the AMBER setup, insertion of the AMPAR TMD into a palmitoylcholine phosphatidylcholine  
327 (POPC) lipid bilayer was performed with the Gromacs internal embedding function, whereas  
328 in the CHARMM setup this process was carried out in CHARMM-GUI (42). The concentration of  
329 KCl, NaCl and CsCl was 274 mM in simulations with AMBER, except for one simulation setup  
330 of the closed channel with the AMBER force field was 284 mM KCl. For CHARMM simulations,  
331 we used a salt concentration of 212 mM. Improved lipid parameters (43) and ion parameters  
332 (44) were used in the AMBER simulations. We used the Tip3p water model (45) in all  
333 simulations.

334 All the MD simulations were carried out with the GROMACS software package (versions 2016.1  
335 and 2019.5) (46). Short-range electrostatic interactions were calculated with a cutoff of 1.7  
336 nm, whereas long-range electrostatic interactions were treated by the particle mesh Ewald  
337 method (47). The cutoff for van-der-Waals interactions were set to 1.7 nm. The simulations  
338 were performed at 303 K or 310 K with an enhanced Berendsen thermostat (GROMACS V-  
339 RESCALE thermostat) (48). A surface-tension Berendsen barostat was employed to keep the  
340 pressure within the membrane-plane (XY-axis) at 250 bar \* nm per lipid surfaces and at one  
341 bar in z-axis direction (49). All bonds were constrained with the LINCS algorithm (50).  
342 Interatomic forces (van-der-Waals and Coloumb) were calculated with a 1.5 nm cutoff. Long  
343 range electrostatic forces were computed with the Particle-Mesh-Ewald method. To decrease  
344 computational cost, we employed virtual sites for hydrogens in all AMBER simulations. AMBER  
345 simulations were calculated with an integration time step of 4 fs. All CHARMM-based simulations  
346 used an integration time step of 2 fs.

347 Before starting the simulation of the AMPAR with an ion gradient, the system was firstly energy-  
348 minimized and equilibrated. After the systems energy was minimized to below 1000 kJ/mol  
349 with GROMACS “steepest descent” implementation a 10 ns free equilibration without any  
350 restraints (except those for the linkers) was performed. For CHARMM-based simulations the  
351 recommended energy minimization and equilibration steps from CHARMM-GUI were  
352 performed.

353 For the computational electrophysiology study (17), two copies of the equilibrated system of  
354 the AMPAR TMD in the lipid bilayer were included in a simulation box of typically  $10 \times 10 \times$   
355 20 nm (Figure 1D). A charge gradient and therefore transmembrane potential was generated  
356 by introducing an ion difference of 2, 4 or 6 ions between the two compartments separated by  
357 the two lipid bilayers. Since the instantaneous introduction of a charge gradient into the system  
358 can produce large perturbations in the system we omitted the first 20 ns of every simulation.  
359 During MD simulations, the number of ions in each chamber was kept constant alchemically  
360 by an additional algorithm (17). The resulting membrane potential can be calculated by  
361 double-integration of the charge distribution using the Poisson equation as implemented in the  
362 GROMACS tool *gmx potential* (51). During the simulations a permeation event was counted  
363 when an ion traversed the entire filter region. Individual simulation runs were 500 ns in the  
364 AMBER setups and 250 ns in the CHARMM setups (Table 1).

365 The majority of the production runs were conducted at 303 K using a charge imbalance ( $\Delta q$ )  
366 of  $6 e^-$  (elementary charges) between the two compartments  $\alpha$  and  $\beta$  (Figure 1D). Although  
367 ion channel recordings are possible at these voltages, they lay well outside the physiological  
368 range. We additionally simulated  $K^+$  permeation using  $\Delta q$  of 4 and  $2 e^-$  with AMBER99sb,  
369 respectively, corresponding to a voltage difference of 275 mV and 100 mV. The simulation at  
370 275 mV shows a similar conductance to the one at 450 mV. At 100 mV, the conductance is less  
371 but still substantial (Table 1, Figure 2B), indicating that similar conduction mechanisms are at  
372 play. The principal consequence of high membrane voltage is merely statistical – it allows us  
373 to record more permeation. Furthermore, compared to the simulations conducted at 303 K we  
374 noted that simulations at 310 K revealed only slightly larger currents but with much greater  
375 variations in the ion permeation rate within a given simulation run (Figure 2B). Finally, to  
376 buttress our observations and validate the relevance of the starting structure, we performed  
377 equivalent MD simulations of a closed AMPA structure (PDB ID: 5WEM; GluA2-GSG1L-apo-1)  
378 with the ATD, LBD and GSG1L removed, and extracellular peptide termini restrained. We  
379 observed no ion permeation events over the same time scale as the open structure simulations,  
380 and the structure did not spontaneously open on this timescale.

381 To align results over different setups we used the center of mass of the backbone carbons of  
382 the classical selectivity filter residues (<sup>586</sup>QQGCD<sup>590</sup>) as a reference point. All trajectories were  
383 analysed with GROMACS tools and PYTHON using MDANALYSIS (52). Molecular visualizations  
384 were made with VMD (53).

### 385 *Patch Clamp Electrophysiology*

386 HEK293 cells were plated on glass coverslips in dishes and incubated for 20-44 hr before  
387 calcium phosphate transfection with 3  $\mu$ g of cDNA. For macroscopic current recordings, the  
388 cDNA transfection was done with the Rat GluA2 (Q) pRK5 vector encoding enhanced green  
389 fluorescent protein after an IRES. Single channel recordings from outside-out patches were  
390 performed 24 hr after transfection. For single channel recordings, we used a plasmid ratio  
391 approach to obtain sparse expression(54), whereby the rat GluA2 Q vector was cotransfected  
392 with enhanced green fluorescent protein and empty vector (pCDNA3.1+) in a ratio of 1 : 63 :  
393 313. Standard extracellular solution contained 150 mM NaCl, 0.1 mM MgCl<sub>2</sub>, 0.1 mM CaCl<sub>2</sub>, 5  
394 mM HEPES, 10  $\mu$ M EDTA and was titrated with NaOH to a pH of 7.3. We included EDTA to  
395 chelate trace divalent ion contamination. The internal solution contained 115 mM NaCl, 1 mM  
396 MgCl<sub>2</sub>, 0.5 mM CaCl<sub>2</sub>, 10 mM NaF, 5 mM Na<sub>4</sub>BAPTA, 10 mM Na<sub>2</sub>ATP, 5 mM HEPES, titrated  
397 to a pH of 7.3 with NaOH. Pipettes were mounted in an ISO holder (G23 Instruments, London,  
398 UK) and had a resistance of 3 M $\Omega$  for macroscopic current recordings. For single channel  
399 recording, pipettes were fire polished to a resistance of 10-25 M $\Omega$  and were coated with  
400 Sylgard. The junction potential between the pipette and Na<sup>+</sup>-bath solution ( $E_{\text{bath}}-E_{\text{pip}}$ ,  
401 considering Na<sup>+</sup>, Cl<sup>-</sup> and F<sup>-</sup> mobilities) was 3.7 mV (55). For reversal potential experiments  
402 with Cs, we substituted NaCl in the extracellular solution with CsCl and titrated the pH to 7.3  
403 with CsOH. CTZ (Hello Bio) was prepared as a 100 mM stock solution in DMSO and used at  
404 100  $\mu$ M (giving a final concentration of 0.1% DMSO. EDTA stock solution was prepared in  
405 NaOH. Reagents were obtained from Carl Roth GmbH (Karlsruhe, Germany), Sigma Aldrich  
406 (Munich, Germany), or Toronto Research Chemicals (Toronto, Canada). Ultra-fast perfusion  
407 to outside-out patches was used for drug application. The perfusion tools were made with  
408 custom designed four-barrel glass (Vitrocom, Mountain Lakes, USA). Currents were filtered at  
409 10 kHz (-3 dB cutoff, 8-pole Bessel) with an Axopatch 200B amplifier (Molecular Devices,  
410 Sunnyvale, USA). For analogue-digital conversion an InstruTECH ITC-18 digitizer (HEKA  
411 Elektronik Dr. Schulze GmbH, Lambrecht, Germany) was used at 40 kHz sampling rate. Data  
412 were recorded and analysed with AxoGraph X (AxoGraph Scientific, Sydney, Australia).

413 For single channel conductance measurements, in each record, we ran a ramp protocol (-120  
414 to +120 mV, 1.2 V s<sup>-1</sup>) both before and during glutamate application (10 mM) to the outside

415 out patch. The leak current recorded during the no-glutamate ramp was subtracted from the  
416 current recorded during glutamate application. Stretches of the recording corresponding to one  
417 open channel were selected, the open levels were selected, and fit with a linear relation to  
418 obtain the chord conductance.

419 For macroscopic measurements of reversal potential and conductance, we alternated washing  
420 each patch with Cs<sup>+</sup> and Na<sup>+</sup> solution. Slope conductances were fit to the traces over the 30  
421 mV ranges at the extreme positive and negative ends of the ramp. For the slope conductance,  
422 we compared the conductance ratios (Cs vs Na inward and Na vs Na outward) from the same  
423 patch against the null (ratio = 1) using a paired t-test. We assumed that there was a similar  
424 junction potential (within 0.5 mV) in both cases, because the junction potential from the  
425 pipette to the Cs<sup>+</sup> solution (-1.7 mV) is cancelled by a second junction potential from Cs<sup>+</sup>  
426 solution back to the bath electrode in Na<sup>+</sup> (4.9 mV) (56). We added this junction potential to  
427 the measured mean reversal potential. The flow rate through the local perfusion tool was low  
428 (< 200 μL per minute), meaning the overall bath Cs<sup>+</sup> concentration remained low.

429 We used the Goldman-Hodgkin-Katz equation (57) to calculate permeability ratios based on  
430 reversal potentials:

$$431 \quad P_X/P_{Na} = [Na^+]_i/[X^+]_o \cdot e^{\frac{FE_{rev}}{RT}} \quad (1)$$

432 where X was Na<sup>+</sup> or Cs<sup>+</sup>.

433 Likewise, to calculate the putative shift in  $E_{rev}$  due to a minor Chloride permeability, we  
434 assumed  $P_{Cl:Na}$  of 1:220 and  $P_{Cs:Na}$  of 1.16:1, as measured.

$$435 \quad E_{rev} = \frac{RT}{F} \cdot \ln \left( \frac{[Na^+]_o + P_{Cs:Na} \cdot [Cs^+]_o + P_{Cl:Na} \cdot [Cl^-]_i}{[Na^+]_i + P_{Cs:Na} \cdot [Cs^+]_i + P_{Cl:Na} \cdot [Cl^-]_o} \right) \quad (2)$$

436 Statistical analysis and data plotting was done in IGOR Pro (Wavemetrics).

437 **Acknowledgments**

438 This work was funded by the Deutsche Forschungsgemeinschaft (DFG) RU2518 DynIon to  
439 A.J.R.P. (P3; PL 619/5-1) and H.S. (P3; SU 997/1-1), the DFG under Germany's Excellence  
440 Strategy – EXC 2008 – 390540038 – UniSysCat to H.S, a DFG Heisenberg Professorship (PL  
441 619/3-1) to A.J.R.P. and the ERC CoG “GluActive” (647895) to A.J.R.P. The computations were  
442 performed with resources provided by the North-German Supercomputing Alliance (HLRN).  
443 The authors gratefully acknowledge the Gauss Centre for Supercomputing e.V. ([www.gauss-](http://www.gauss-centre.eu)  
444 [centre.eu](http://www.gauss-centre.eu)) for funding this project by providing computing time through the John von  
445 Neumann Institute for Computing (NIC) on the GCS Supercomputer JUWELS at Jülich  
446 Supercomputing Centre (JSC).

447 The authors declare no competing financial interests.

448 **Author contributions**

449 All authors designed the experiments, performed the experiments and/or analysed data, wrote  
450 and edited the manuscript.



| Cation                   | Force Field                     | $\Delta q$ (e <sup>-</sup> ) | [C] (mM) | $V_m$ (mV)   | $T$ (K) | Replicates | Ion Permeations | $\gamma$ (pS) |
|--------------------------|---------------------------------|------------------------------|----------|--------------|---------|------------|-----------------|---------------|
| K <sup>+</sup>           | AMBER                           | 6                            | 273.8    | 440          | 303     | 5          | 220             | 33 ± 11       |
| K <sup>+</sup>           | AMBER                           | 2                            | 273.8    | 100          | 303     | 5          | 18              | 12 ± 12       |
| Na <sup>+</sup>          | AMBER                           | 6                            | 273.8    | 490          | 303     | 5          | 50              | 6 ± 3         |
| K <sup>+</sup>           | CHARMM                          | 6                            | 212.1    | 230          | 303     | 5          | 144             | 78 ± 41       |
| Na <sup>+</sup>          | CHARMM                          | 6                            | 212.1    | 325          | 303     | 5          | 63              | 25 ± 10       |
| Cs <sup>+</sup>          | AMBER                           | 6                            | 273.8    | 400          | 303     | 6          | 133             | 18 ± 13       |
| Cs <sup>+</sup>          | CHARMM                          | 6                            | 212.1    | 280          | 303     | 4          | 121             | 71 ± 28       |
| K <sup>+</sup>           | AMBER                           | 6                            | 273.8    | 450          | 310     | 5          | 300             | 43 ± 39       |
| K <sup>+</sup>           | AMBER                           | 4                            | 273.8    | 270          | 310     | 5          | 163             | 42 ± 33       |
| K <sup>+</sup><br>closed | AMBER                           | 6                            | 284      | 350          | 303     | 3          | 0               | 0             |
| Na <sup>+</sup>          | <i>Single Channel Recording</i> | -                            | 150      | -120 to +120 | 296     | 3 patches  | -               | 30 ± 1.6      |

451 **Table 1. Summary of computational electrophysiology simulations**

452 Simulations of the GluA2 transmembrane domain for individual permeating monovalent  
453 cations Na<sup>+</sup>, K<sup>+</sup> and Cs<sup>+</sup>. In addition to changing cations, we also varied temperature ( $T$ ),  
454 charge imbalance ( $\Delta q$ ) and the force field employed.  $C$  is the salt concentration for each  
455 simulation. Each simulation replicate was 500 ns except for CHARMM runs where the duration  
456 was 250 ns. These simulations represent an aggregate time of 20.5  $\mu$ s. AMBER refers to  
457 AMBER99sb and CHARMM to CHARMM36. For comparison, the conductance of GluA2 ( $\gamma$ ) in Na<sup>+</sup>  
458 determined from 3 single channel recordings is also included.

## 459 References

- 460 1. Twomey EC, Yelshanskaya MV, Grassucci RA, Frank J, Sobolevsky AI (2017) Channel  
461 opening and gating mechanism in AMPA-subtype glutamate receptors. *Nature*
- 462 2. Chen S *et al.* (2017) Activation and Desensitization Mechanism of AMPA Receptor-  
463 TARP Complex by Cryo-EM. *Cell* 170(6):1234–1246.e14.
- 464 3. Jatzke C, Wollmuth LP (2002) Voltage and concentration dependence of  
465 Ca<sup>2+</sup> permeability in recombinant glutamate receptor subtypes. *The Journal of*  
466 *Physiology* 538(1):25–39.
- 467 4. Plested AJR, Vijayan R, Biggin PC, Mayer ML (2008) Molecular basis of kainate receptor  
468 modulation by sodium. *Neuron* 58(5):720–735.
- 469 5. Prieto ML, Wollmuth LP (2010) Gating modes in AMPA receptors. *J Neurosci*  
470 30(12):4449–4459.
- 471 6. Bernèche S, Roux B (2001) Energetics of ion conduction through the K<sup>+</sup> channel.  
472 *Nature* 414(6859):73–77.
- 473 7. Shrivastava IH, Sansom MS (2000) Simulations of ion permeation through a potassium  
474 channel: molecular dynamics of KcsA in a phospholipid bilayer. *Biophys J* 78(2):557–  
475 570.
- 476 8. Doyle DA *et al.* (1998) The structure of the potassium channel: molecular basis of K<sup>+</sup>  
477 conduction and selectivity. *Science* 280(5360):69–77.
- 478 9. Kopec W *et al.* (2018) Direct knock-on of desolvated ions governs strict ion selectivity in  
479 K<sup>+</sup> channels. *Nat Chem* 10(8):813–820.
- 480 10. Shi C *et al.* (2018) A single NaK channel conformation is not enough for non-selective  
481 ion conduction. *Nat Commun* 9(1):717.
- 482 11. Napolitano LMR *et al.* (2015) A structural, functional, and computational analysis  
483 suggests pore flexibility as the base for the poor selectivity of CNG channels. *Proc Natl*  
484 *Acad Sci U S A* 112(27):E3619–28.
- 485 12. Herguedas B *et al.* (2019) Architecture of the heteromeric GluA1/2 AMPA receptor in  
486 complex with the auxiliary subunit TARP  $\gamma$ 8. *Science* 364(6438):eaav9011.
- 487 13. Lee CH, MacKinnon R (2017) Structures of the Human HCN1 Hyperpolarization-  
488 Activated Channel. *Cell* 168(1-2):111–120.e11.
- 489 14. Li M *et al.* (2017) Structure of a eukaryotic cyclic-nucleotide-gated channel. *Nature*  
490 542(7639):60–65.
- 491 15. Zhou Y, Morais-Cabral JH, Kaufman A, MacKinnon R (2001) Chemistry of ion  
492 coordination and hydration revealed by a K<sup>+</sup> channel-Fab complex at 2.0 Å resolution.  
493 *Nature* 414(6859):43–48.
- 494 16. Saotome K, Singh AK, Yelshanskaya MV, Sobolevsky AI (2016) Crystal structure of the  
495 epithelial calcium channel TRPV6. *Nature* 534(7608):506–511.
- 496 17. Kutzner C, Grubmüller H, de Groot BL, Zachariae U (2011) Computational  
497 electrophysiology: the molecular dynamics of ion channel permeation and selectivity in  
498 atomistic detail. *Biophys J* 101(4):809–817.
- 499 18. Kutzner C *et al.* (2016) Insights into the function of ion channels by computational  
500 electrophysiology simulations. *Biochim Biophys Acta* 1858(7 Pt B):1741–1752.

- 501 19. Verdoorn TA, Burnashev N, Monyer H, Seeburg PH, Sakmann B (1991) Structural  
502 determinants of ion flow through recombinant glutamate receptor channels. *Science*  
503 252(5013):1715–1718.
- 504 20. Lindorff-Larsen K *et al.* (2010) Improved side-chain torsion potentials for the Amber  
505 ff99SB protein force field. *Proteins* 78(8):1950–1958.
- 506 21. Huang J, MacKerell AD (2013) CHARMM36 all-atom additive protein force field:  
507 validation based on comparison to NMR data. *J Comput Chem* 34(25):2135–2145.
- 508 22. Zubcevic L, Le S, Yang H, Lee SY (2018) Conformational plasticity in the selectivity  
509 filter of the TRPV2 ion channel. *Nat Struct Mol Biol* 25(5):405–415.
- 510 23. Liao M, Cao E, Julius D, Cheng Y (2013) Structure of the TRPV1 ion channel  
511 determined by electron cryo-microscopy. *Nature* 504(7478):107–112.
- 512 24. Panchenko VA, Glasser CR, Mayer ML (2001) Structural similarities between glutamate  
513 receptor channels and K(+) channels examined by scanning mutagenesis. *J Gen Physiol*  
514 117(4):345–360.
- 515 25. Burnashev N, Villarroel A, Sakmann B (1996) Dimensions and ion selectivity of  
516 recombinant AMPA and kainate receptor channels and their dependence on Q/R site  
517 residues. *J Physiol* 496 (Pt 1):165–173.
- 518 26. Caralampio DZ, Martínez JM, Pappalardo RR, Marcos ES (2017) The hydration  
519 structure of the heavy-alkalines Rb<sup>+</sup> and Cs<sup>+</sup> through molecular dynamics and X-ray  
520 absorption spectroscopy: surface clusters and eccentricity. *Phys Chem Chem Phys*  
521 19(42):28993–29004.
- 522 27. Ulmschneider MB *et al.* (2013) Molecular dynamics of ion transport through the open  
523 conformation of a bacterial voltage-gated sodium channel. *Proc Natl Acad Sci U S A*  
524 110(16):6364–6369.
- 525 28. Mähler J, Persson I (2012) A study of the hydration of the alkali metal ions in aqueous  
526 solution. *Inorganic Chemistry* 51(1):425–438.
- 527 29. Köpfer DA *et al.* (2014) Ion permeation in K<sup>+</sup> channels occurs by direct Coulomb knock-  
528 on. *Science* 346(6207):352–355.
- 529 30. Alam A, Jiang Y (2009) High-resolution structure of the open NaK channel. *Nat Struct*  
530 *Mol Biol* 16(1):30–34.
- 531 31. Alam A, Jiang Y (2009) Structural analysis of ion selectivity in the NaK channel. *Nat*  
532 *Struct Mol Biol* 16(1):35–41.
- 533 32. Schneggenburger R (1996) Simultaneous measurement of Ca<sup>2+</sup> influx and reversal  
534 potentials in recombinant N-methyl-D-aspartate receptor channels. *Biophys J*  
535 70(5):2165–2174.
- 536 33. Biggin PC, Smith GR, Shrivastava I, Choe S, Sansom MS (2001) Potassium and sodium  
537 ions in a potassium channel studied by molecular dynamics simulations. *Biochim*  
538 *Biophys Acta* 1510(1-2):1–9.
- 539 34. Kühlbrandt W (2016) Three in a row-how sodium ions cross the channel. *EMBO J*  
540 35(8):793–795.
- 541 35. Boiteux C, Vorobyov I, Allen TW (2014) Ion conduction and conformational flexibility  
542 of a bacterial voltage-gated sodium channel. *Proc Natl Acad Sci U S A* 111(9):3454–  
543 3459.

- 544 36. Furini S, Domene C (2018) Ion-triggered selectivity in bacterial sodium channels. *Proc*  
545 *Natl Acad Sci U S A* 115(21):5450–5455.
- 546 37. Labro AJ, Cortes DM, Tilegenova C, Cuello LG (2018) Inverted allosteric coupling  
547 between activation and inactivation gates in K<sup>+</sup> channels. *Proc Natl Acad Sci U S A*  
548 115(21):5426–5431.
- 549 38. Poulsen MH, Poshtiban A, Klippenstein V, Ghisi V, Plested AJR (2019) Gating modules  
550 of the AMPA receptor pore domain revealed by unnatural amino acid mutagenesis. *Proc*  
551 *Natl Acad Sci U S A*
- 552 39. Riva I, Eibl C, Volkmer R, Carbone AL, Plested AJ (2017) Control of AMPA receptor  
553 activity by the extracellular loops of auxiliary proteins. *Elife* 6
- 554 40. Kopec W, Rothberg BS, de Groot BL (2019) Molecular mechanism of a potassium  
555 channel gating through activation gate-selectivity filter coupling. *Nat Commun*  
556 10(1):5366.
- 557 41. Webb B, Sali A (2016) Comparative Protein Structure Modeling Using MODELLER. *Curr*  
558 *Protoc Bioinformatics* 54:5.6.1–5.6.37.
- 559 42. Jo S, Kim T, Iyer VG, Im W (2008) CHARMM-GUI: a web-based graphical user interface  
560 for CHARMM. *J Comput Chem* 29(11):1859–1865.
- 561 43. Berger O, Edholm O, Jähnig F (1997) Molecular dynamics simulations of a fluid bilayer  
562 of dipalmitoylphosphatidylcholine at full hydration, constant pressure, and constant  
563 temperature. *Biophys J* 72(5):2002–2013.
- 564 44. Joung IS, Cheatham TE (2008) Determination of alkali and halide monovalent ion  
565 parameters for use in explicitly solvated biomolecular simulations. *J Phys Chem B*  
566 112(30):9020–9041.
- 567 45. Jorgensen WL, Chandrasekhar J, Madura JD, Impey RW, Klein ML (1983) Comparison  
568 of simple potential functions for simulating liquid water. *The Journal of Chemical Physics*  
569 79(2):926–935.
- 570 46. Abraham MJ *et al.* (2015) GROMACS: High performance molecular simulations through  
571 multi-level parallelism from laptops to supercomputers. *SoftwareX* 1-2:19–25.
- 572 47. Darden T, York D, Pedersen L (1993) Particle mesh Ewald: An N · log (N) method for  
573 Ewald sums in large systems. *The Journal of chemical physics* 98(12):10089–10092.
- 574 48. Bussi G, Donadio D, Parrinello M (2007) Canonical sampling through velocity rescaling.  
575 *J Chem Phys* 126(1):014101.
- 576 49. Zhu Q, Vaughn MW (2005) Surface tension effect on transmembrane channel stability  
577 in a model membrane. *The Journal of Physical Chemistry B* 109(41):19474–19483.
- 578 50. Hess B, Bekker H, Berendsen HJC, Fraaije JGEM (1997) LINCS: a linear constraint  
579 solver for molecular simulations. *Journal of computational chemistry* 18(12):1463–1472.
- 580 51. Tieleman DP, Berendsen HJC (1996) Molecular dynamics simulations of a fully  
581 hydrated dipalmitoylphosphatidylcholine bilayer with different macroscopic boundary  
582 conditions and parameters. *The Journal of chemical physics* 105(11):4871–4880.
- 583 52. Gowers R *et al.* (2016) MDAnalysis: A Python Package for the Rapid Analysis of  
584 Molecular Dynamics Simulations. *Proceedings of the 15th Python in Science Conference*

- 585 53. Humphrey W, Dalke A, Schulten K (1996) VMD: visual molecular dynamics. *J Mol*  
586 *Graph* 14(1):33–8, 27.
- 587 54. Groot-Kormelink PJ, Beato M, Finotti C, Harvey RJ, Sivilotti LG (2002) Achieving  
588 optimal expression for single channel recording: a plasmid ratio approach to the  
589 expression of  $\alpha 1$  glycine receptors in HEK293 cells. *Journal of Neuroscience Methods*  
590 113(2):207–214.
- 591 55. Barry PH, Lynch JW (1991) Liquid junction potentials and small cell effects in patch-  
592 clamp analysis. *J Membr Biol* 121(2):101–117.
- 593 56. Neher E (1992) [6] Correction for liquid junction potentials in patch clamp  
594 experiments. *Methods in enzymology* 207:123–131.
- 595 57. Goldman DE (1943) POTENTIAL, IMPEDANCE, AND RECTIFICATION IN  
596 MEMBRANES. *J Gen Physiol* 27(1):37–60.
- 597
